# Supplementary material for: Rho1- and Pkc1-dependent phosphorylation of the F-BAR protein Syp1 contributes to septin ring assembly
Source: PubMed Central journal article supplement — Mol Biol Cell. 2015 Sep 15;26(18):3245–62. doi: 10.1091/mbc.E15-06-0366 (PMC4569315; doi:10.1091/mbc.e15-06-0366), 2015-09-15
Supplement: supp_E15-06-0366v1_CombinedSupMats.pdf [file supp_E15-06-0366v1_CombinedSupMats.pdf]

# Supplemental Materials

*Molecular Biology of the Cell*

Merlini et al.

## SUPPLEMENTAL FIGURE LEGENDS

**Figures S1: Rho1 hyperactivation suppresses lethality and cytokinesis defects of *dma1Δ dma2Δ cla4Δ* cells and the temperature-sensitivity of *cdc5* mutants. A,C-E:** Serial dilutions of strains with the indicated genotypes were spotted on YEPD plates and incubated at the indicated temperatures for 2 days. **B:** Wild type and *dma1Δ dma2Δ cla4Δ RHO1-D72N* cells were arrested in G1 by  $\alpha$ -factor and released into fresh medium at 25°C. At the indicated times cells were collected for FACS analysis of DNA contents (histograms) and kinetics of budding, nuclear division and septin ring formation by immunofluorescence with anti-Cdc11 antibodies (graphs).

**Figure S2. The *RHO1-D72N* allele, but not *CDC42-D65N*, suppresses the temperature-sensitivity of mutants defective in septin organization. A-D:** Serial dilutions of stationary phase cultures of strains with the indicated genotypes were spotted on YEPD plates and incubated for 2 days at the indicated temperatures. Centromeric plasmids are indicated in brackets. Several independent transformants or meiotic segregants were analysed for each mutant. **E:** Microcolonies of cells with the indicated genotypes were photographed after 24 hours of incubation at 25°C. **F:** Representative images of cells with the indicated genotypes growing at 25°C.

**Figure S3. The *RHO1-D72N* allele does not accelerate actomyosin ring contraction.** Live cell imaging of wild type and *RHO1-D72N* cells expressing Myo1-GFP and Shs1-mCherry. The time for AMR contraction has been calculated from the beginning of contraction to disappearance of the AMR.

**Figure S4. Hyperactivation of the MAP kinase pathway does not suppress the temperature-sensitivity of *dma1Δ dma2Δ cla4-75* cells.** **A:** Schematic representation of the cell wall integrity (CWI) pathway. **B:** Serial dilutions of stationary phase cultures of strains with the indicated genotypes were spotted on YEPD plates and incubated for two days at the indicated temperatures. Episomal plasmids carrying the tested mutant alleles are in brackets. For each plasmid three independent transformants were analysed. **C:** Log phase cultures of cells with the indicated genotypes were grown at 25°C and shifted at time 0 to 37°C for 30' or 3 hours. Total protein extracts were probed by western blot with phospho-specific and polyclonal anti-Slt2 antibodies.

**Figure S5. *SYP1* deletion suppresses the temperature-sensitivity of *cdc12-1* and *dma1Δ dma2Δ cla4-75* cells and deletion of *PKC1* or *DMA1* and *DMA2* do not affect the timing of Syp1 localization at the bud neck.** **A:** Serial dilutions of stationary phase cultures of strains with the indicated genotypes were spotted on YEPD plates and incubated for two days at the indicated temperatures. **B:** Wild type and *pkc1Δ* cells were grown in sorbitol-containing YEPD medium at 30°C, arrested in G1 by  $\alpha$ -factor and released in YEPD containing sorbitol at 30°C. **C:** Wild type and *dma1Δ dma2Δ* cells were grown in YEPD at 25°C, arrested in G1 by  $\alpha$ -factor and released in YEPD at 25°C. At the indicated time points cell samples were collected for FACS analysis of DNA contents (not shown) and to score budding index, nuclear division and Syp1-HA3 localization at the bud neck by indirect immunofluorescence with anti-HA antibodies (B-C).

**Table S1. Mass spectrometry analysis of Syp1 phosphorylation sites induced *in vitro* by Pkc1.**

**Table S2. Protein coverage of Syp1, Sla1, Ede1 and Fks1 after immunoprecipitation of Syp1-Flag3 and MS/MS analysis.**

**Table S3. List of strains used in this study.**

**A**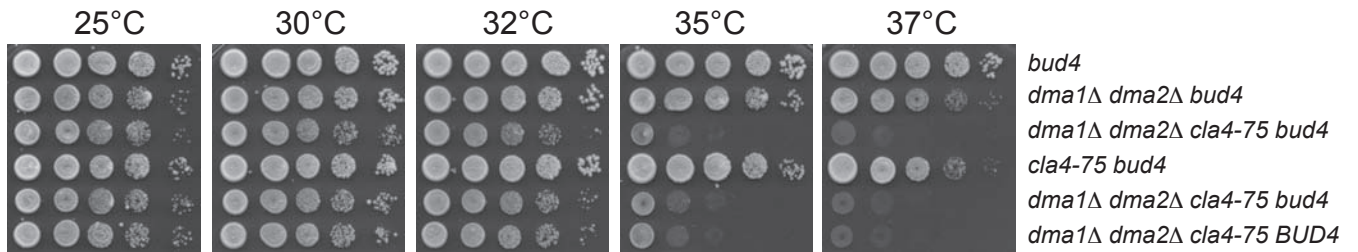**B**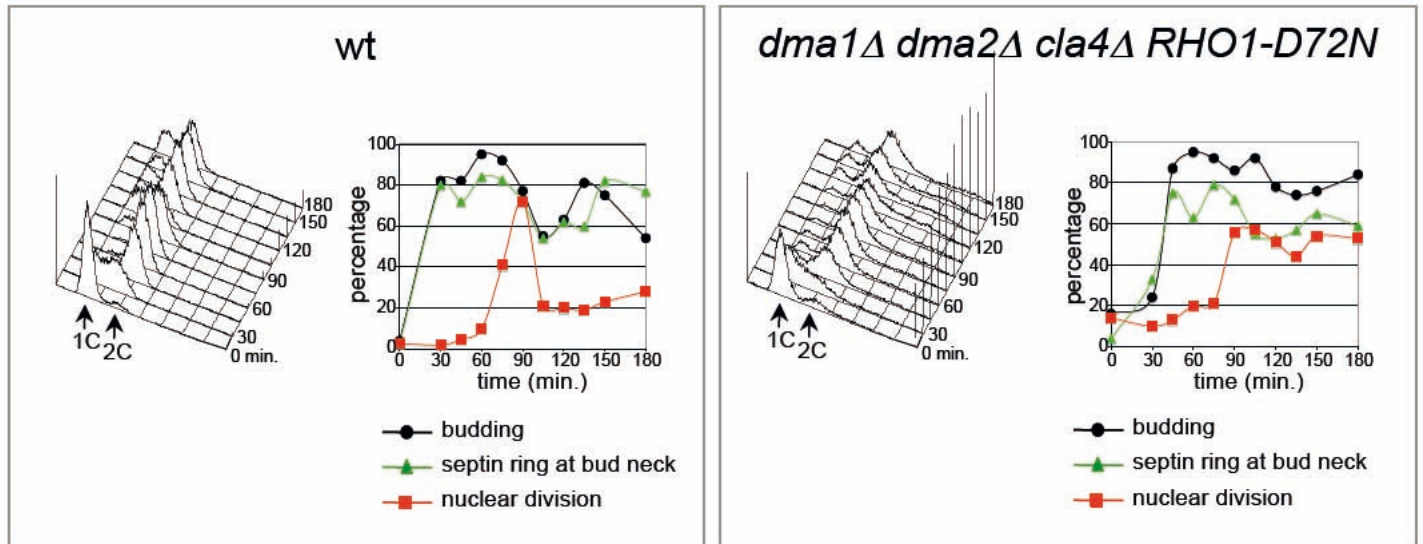**C**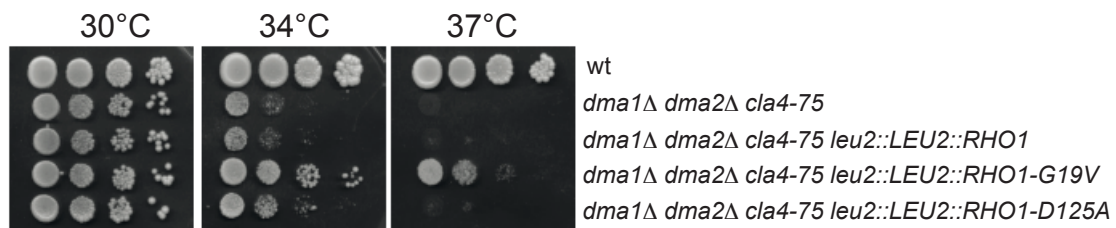**D**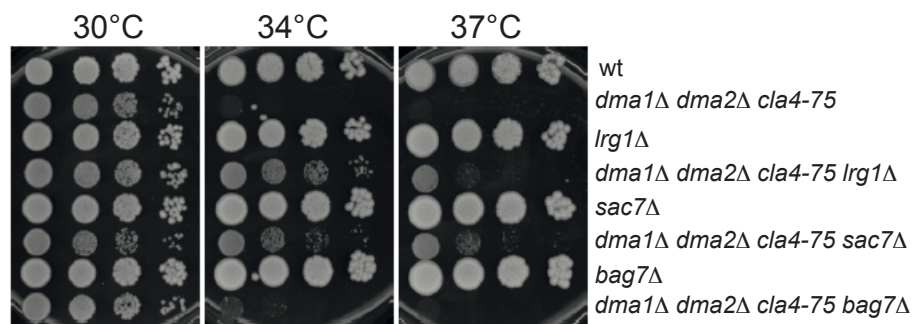**E**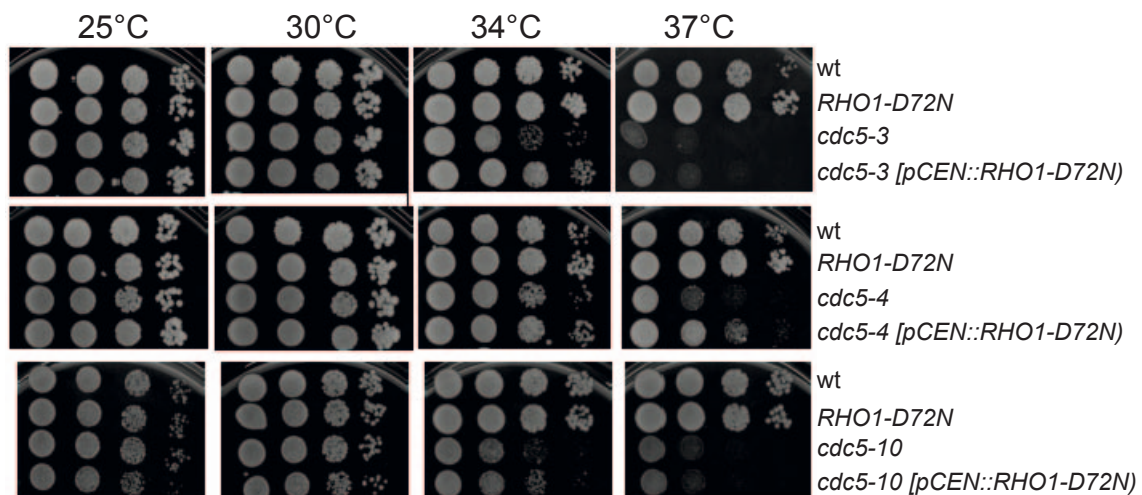

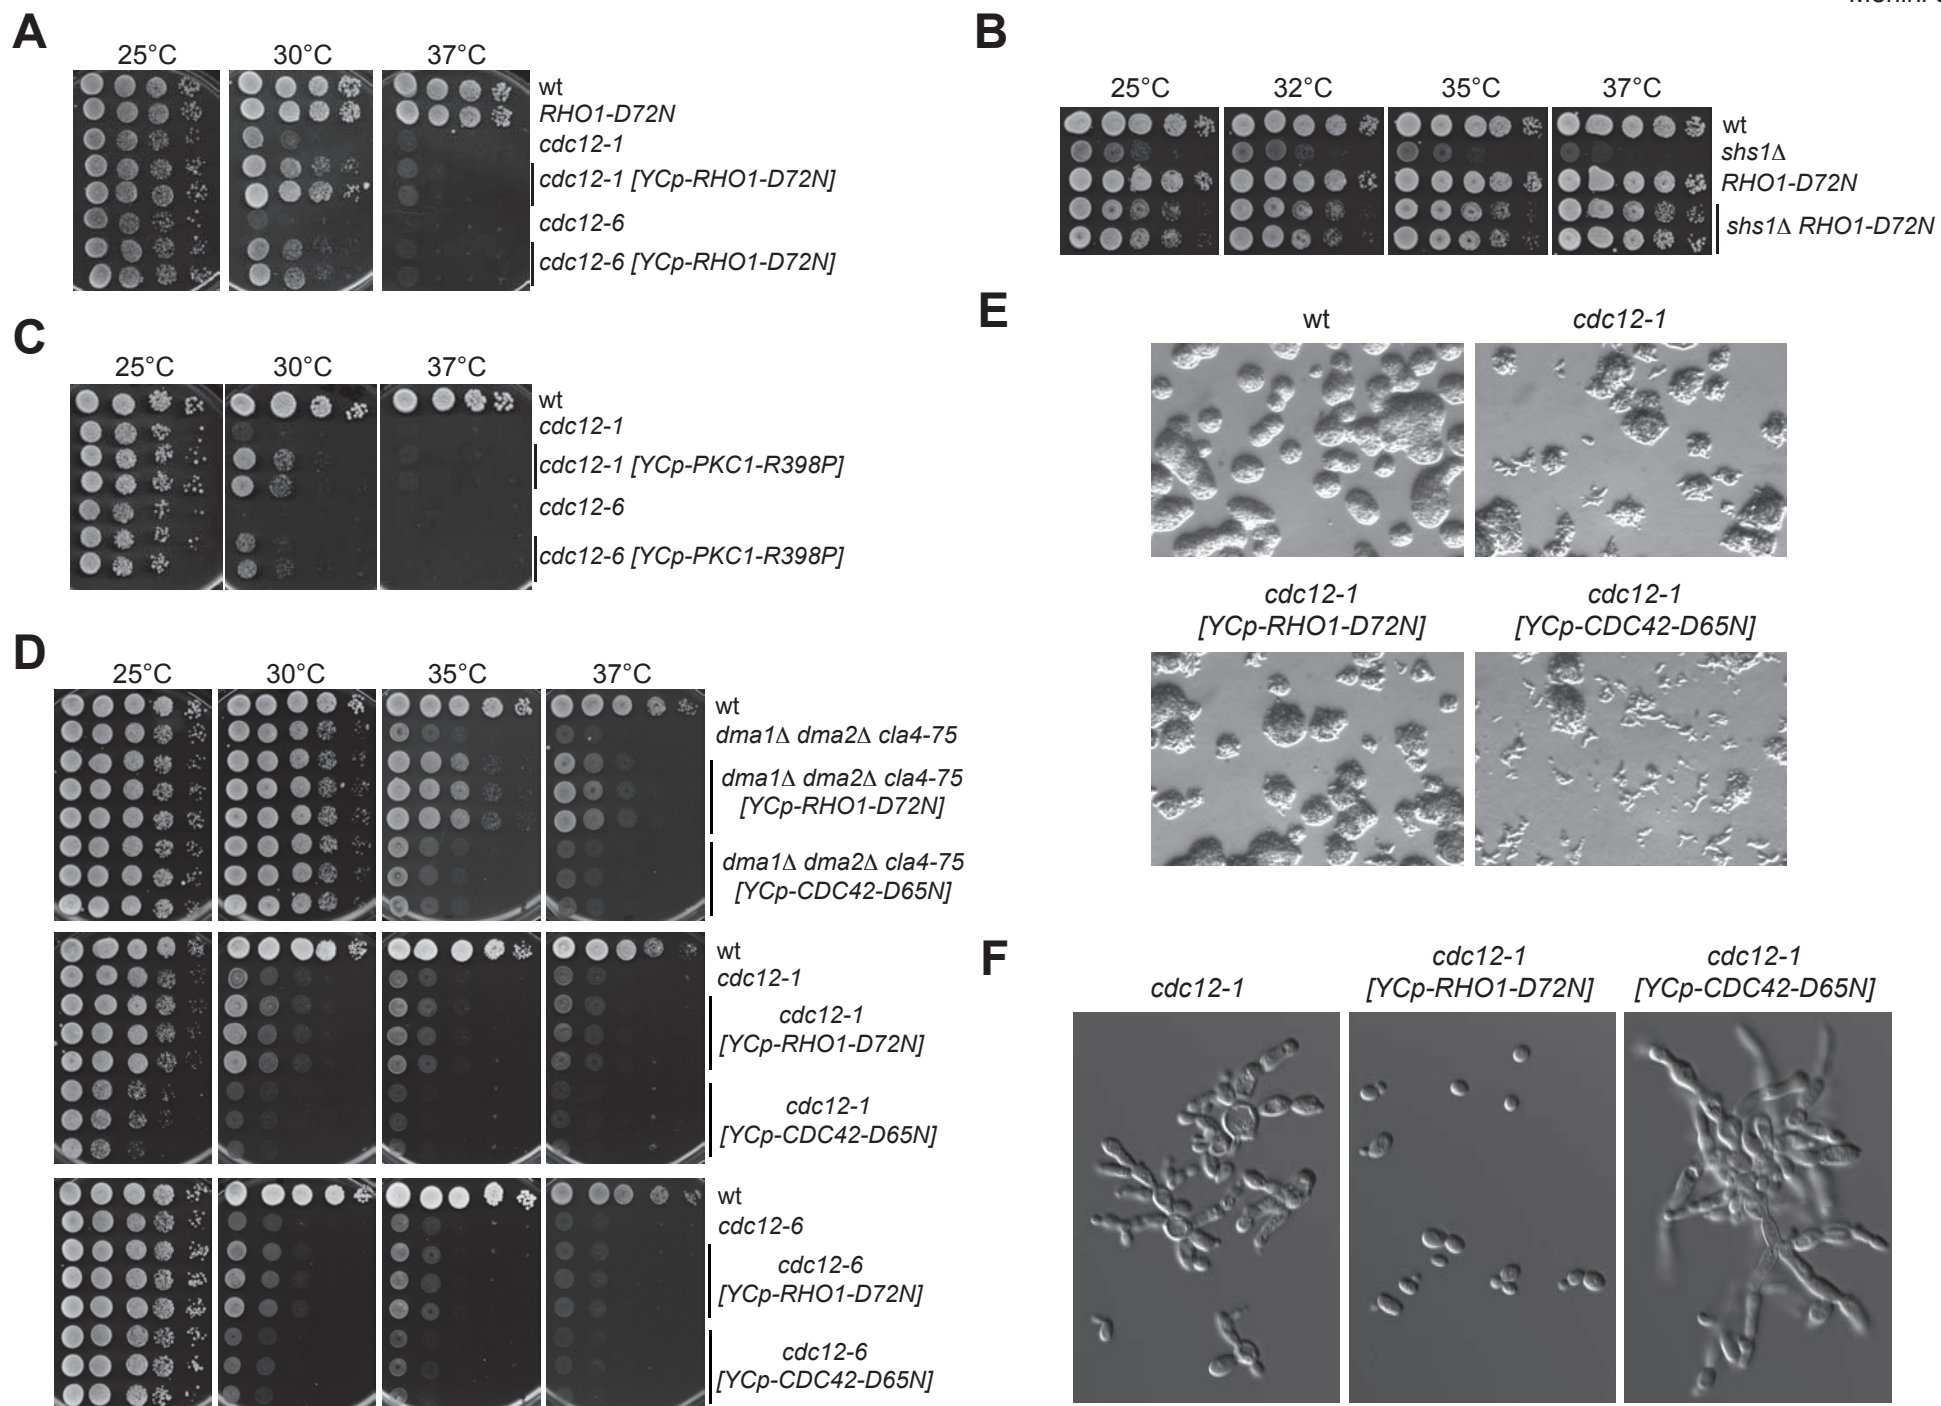

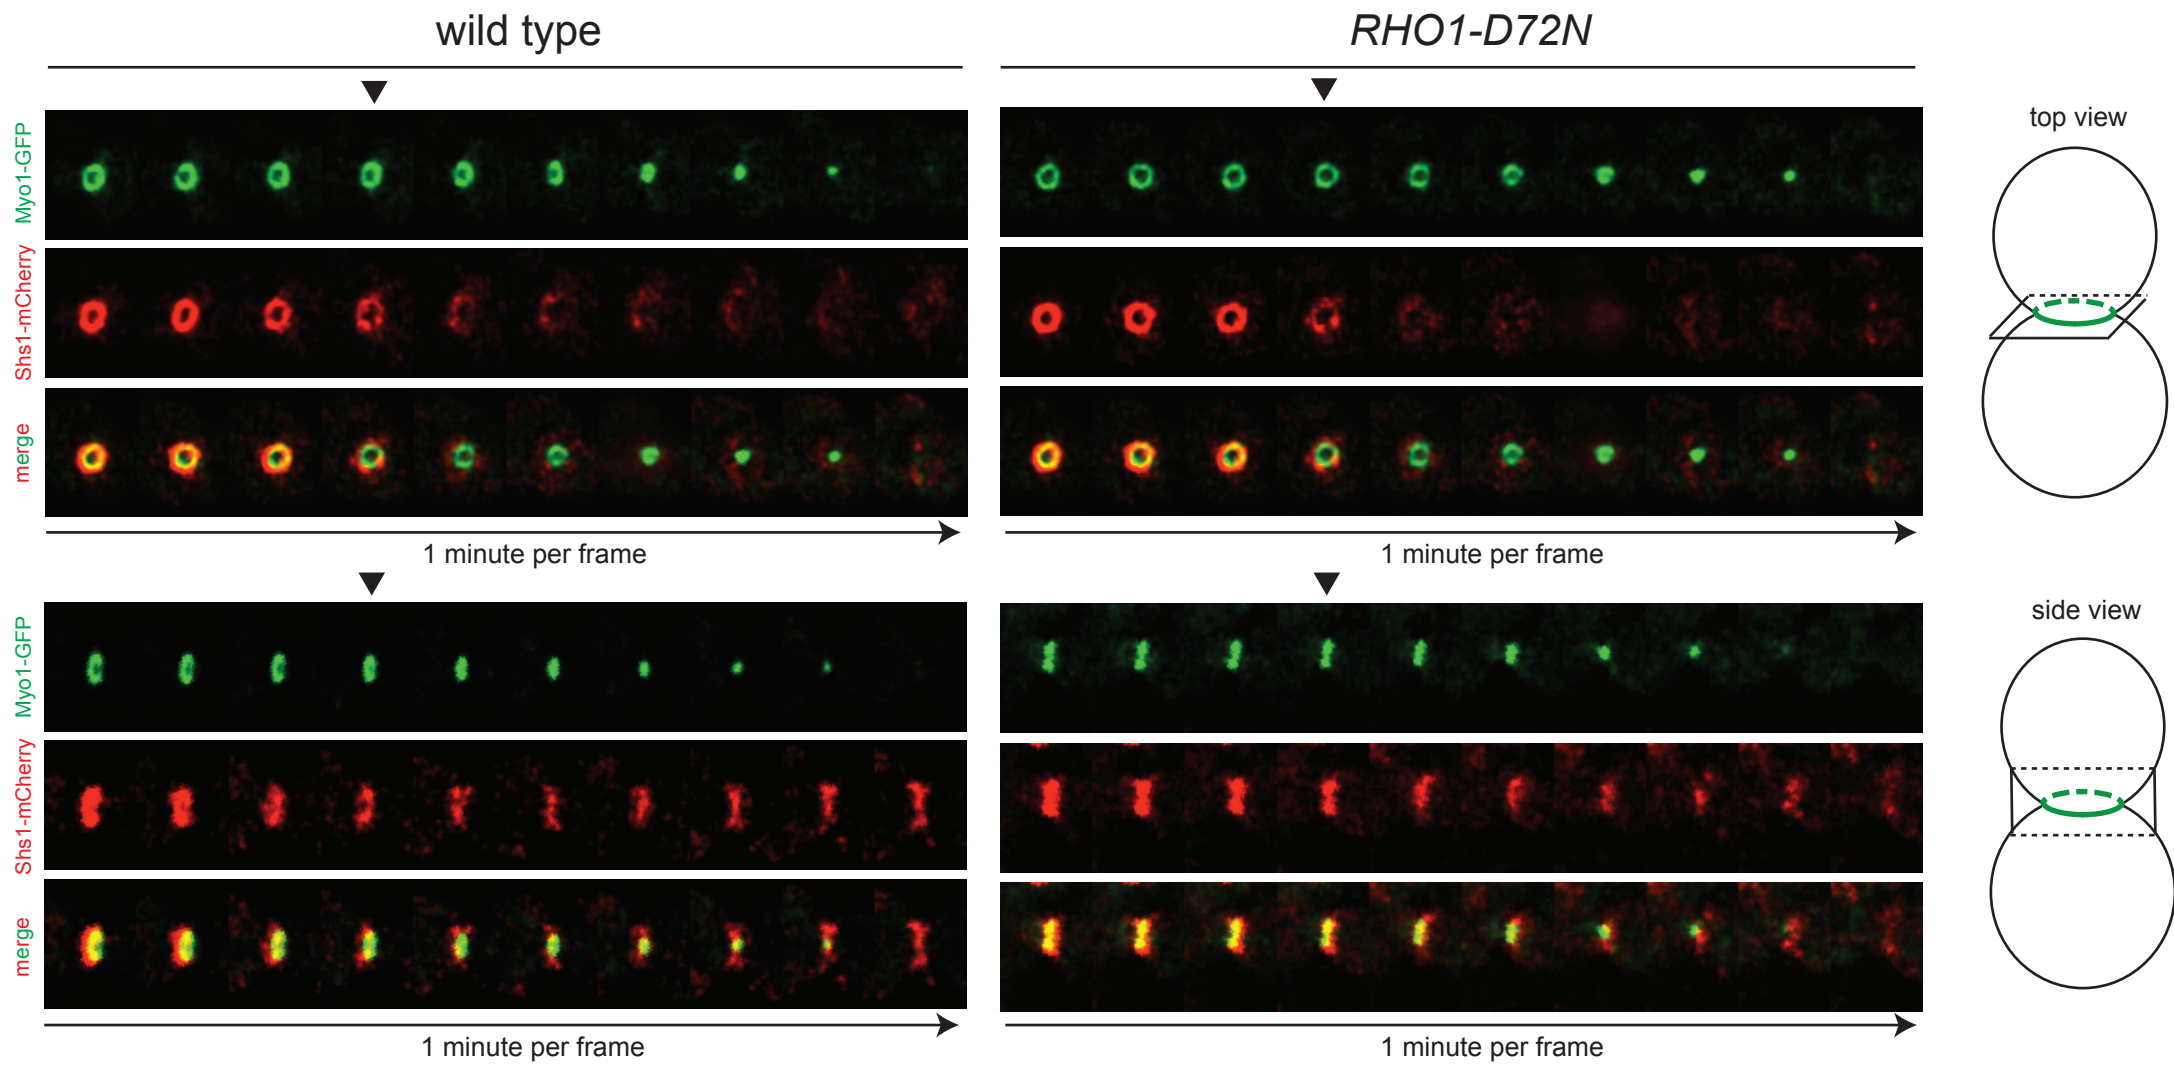

| AMR contraction        |                        |
|------------------------|------------------------|
| wild type              | <i>RHO1-D72N</i>       |
| 6.29 ± 0.64 min (n=35) | 6.83 ± 0.68 min (n=27) |

**A**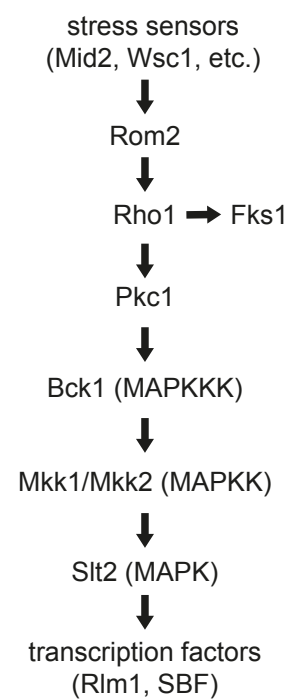**B**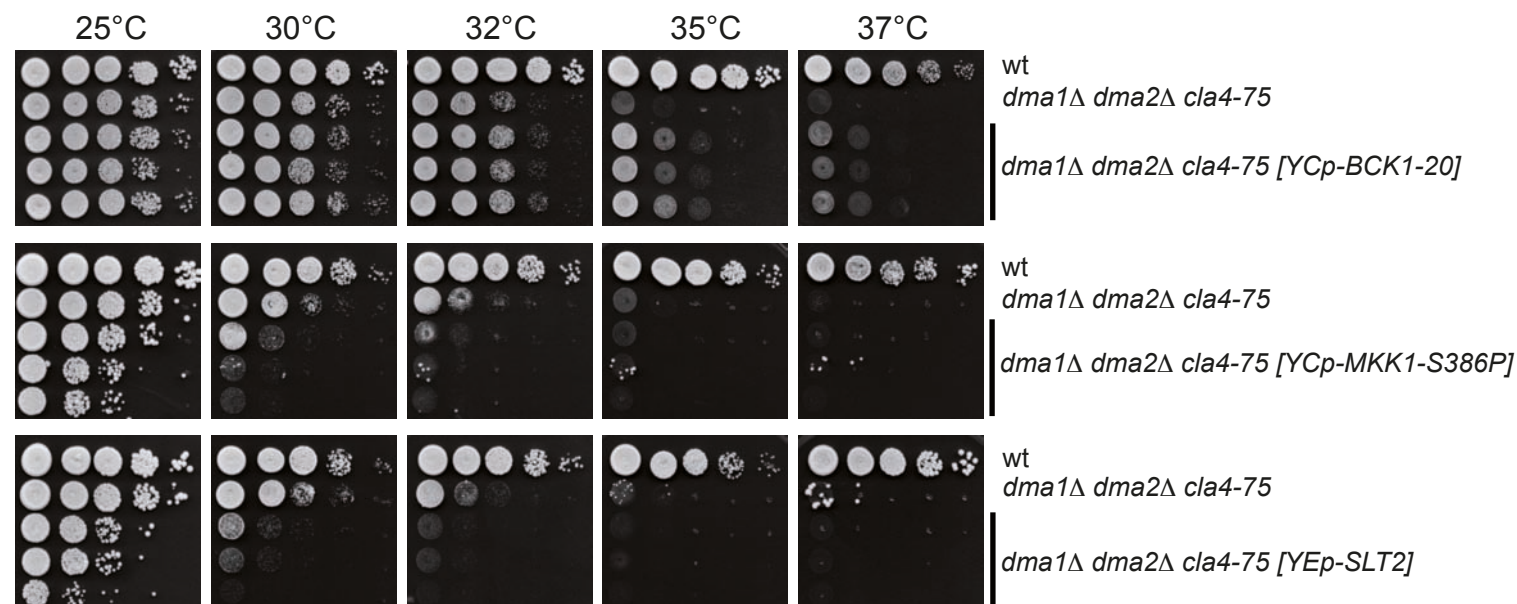**C**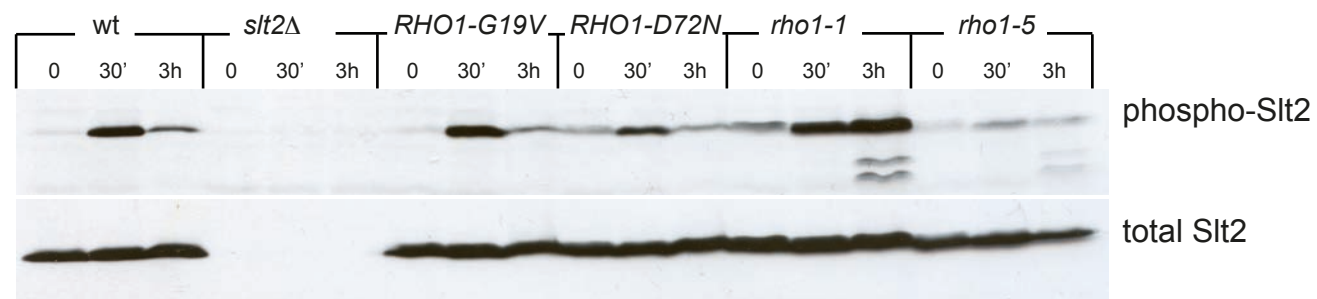



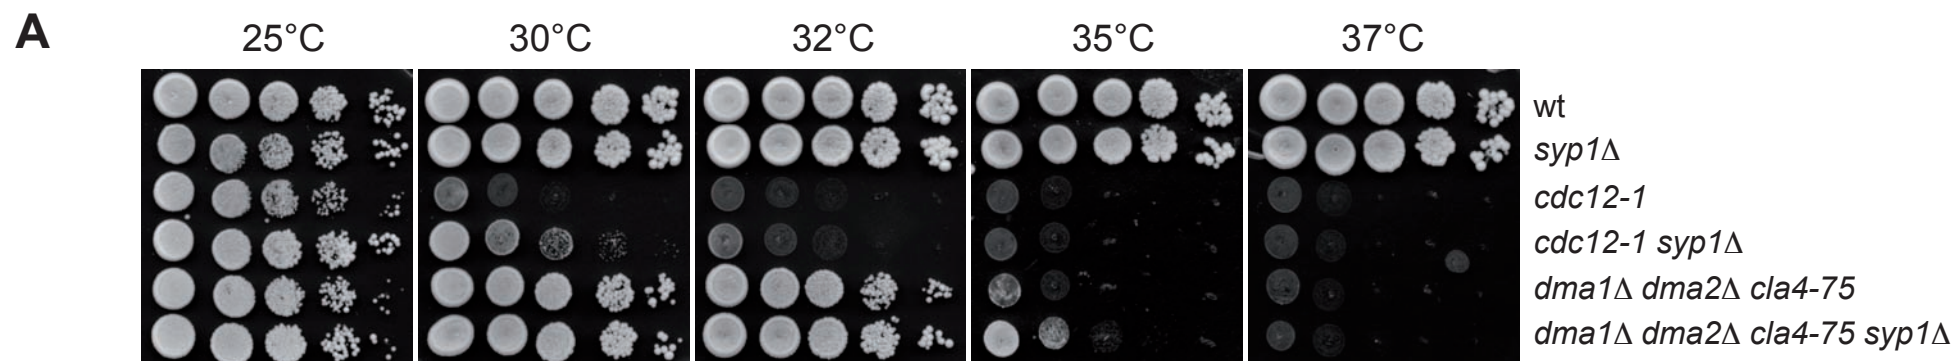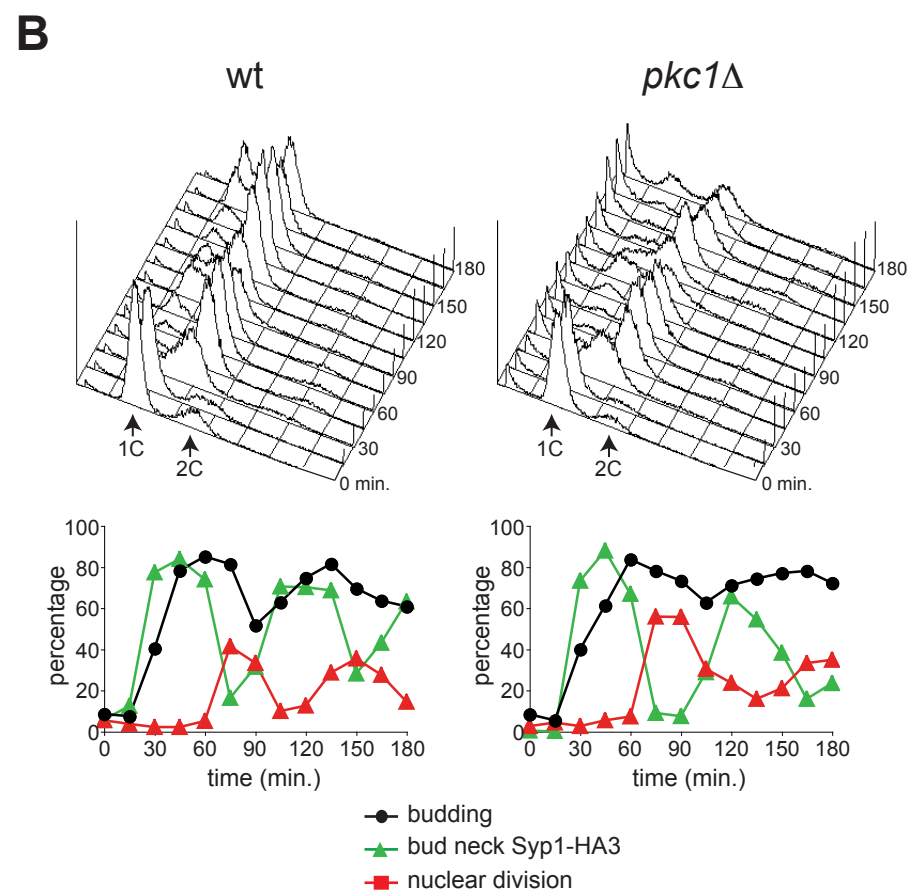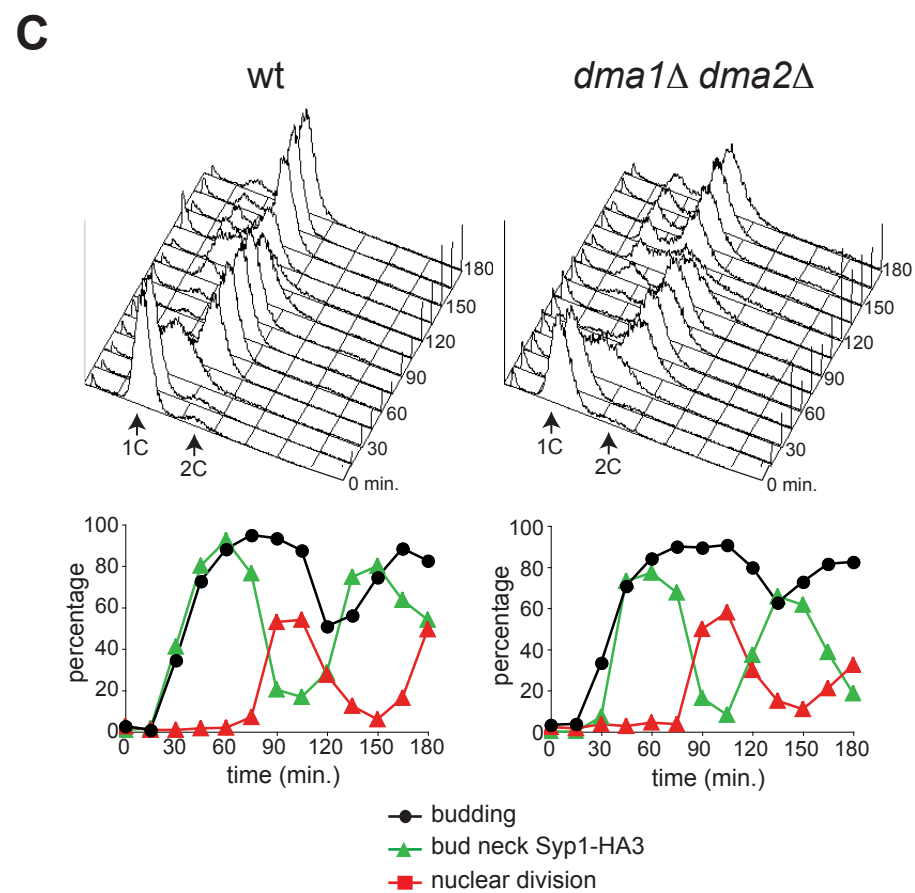

**Table S3. Lists of *Saccharomyces cerevisiae* strains and plasmids used in this study**

**Yeast strains** (Plasmids are indicated in brackets)

| <b>Name</b> | <b>Relevant genotype</b>                                                                                                   |
|-------------|----------------------------------------------------------------------------------------------------------------------------|
| ySP294      | <i>MATa, cdc12-1</i>                                                                                                       |
| ySP5183     | <i>MATa, cdc12-6</i>                                                                                                       |
| ySP5247     | <i>MATa, dma1::K.l.TRP1, dma2::HPHMX, cla4::KanMX4, [CEN::URA3::cla4-75]</i>                                               |
| ySP5264     | <i>MAT<math>\alpha</math>, dma1::K.l.TRP1, dma2::HPHMX, cla4::KanMX4, [CEN::URA3::cla4-75]</i>                             |
| ySP7342     | <i>MATa, shs1::NatN2</i>                                                                                                   |
| ySP7343     | <i>MAT<math>\alpha</math>, dma1::K.l.TRP1, dma2::HPHMX, cla4::KanMX4, [CEN::URA3::cla4-75], RHO1-D72N</i>                  |
| ySP7863     | <i>MAT<math>\alpha</math>, dma1::K.l.TRP1, dma2::HPHMX, cla4::KanMX4, [CEN::URA3::cla4-75], leu2::LEU2::3HA-RHO1-G19V</i>  |
| ySP7864     | <i>MAT<math>\alpha</math>, dma1::K.l.TRP1, dma2::HPHMX, cla4::KanMX4, [CEN::URA3::cla4-75], leu2::LEU2::3HA-RHO1-D125A</i> |
| ySP7887     | <i>MAT<math>\alpha</math>, dma1::K.l.TRP1, dma2::HPHMX, cla4::KanMX4, RHO1-D72N::K.l.LEU2</i>                              |
| ySP7933     | <i>MATa, RHO1-D72N::K.l.LEU2</i>                                                                                           |
| ySP7985     | <i>MAT<math>\alpha</math>, cdc12-6, RHO1-D72N::K.l.LEU2</i>                                                                |
| ySP7986     | <i>MATa, cdc12-6, RHO1-D72N::K.l.LEU2</i>                                                                                  |
| ySP7987     | <i>MATa, cdc12-1, RHO1-D72N::K.l.LEU2</i>                                                                                  |
| ySP7988     | <i>MAT<math>\alpha</math>, cdc12-1, RHO1-D72N::K.l.LEU2</i>                                                                |
| ySP8034     | <i>MAT<math>\alpha</math>, shs1::NatN2, RHO1-D72N::K.l.LEU2</i>                                                            |
| ySP8035     | <i>MATa, shs1::NatN2, RHO1-D72N::K.l.LEU2</i>                                                                              |
| ySP8107     | <i>MAT<math>\alpha</math>, sac7::NatN2</i>                                                                                 |
| ySP8123     | <i>MATa, dma1::K.l.TRP1, dma2::HPHMX, cla4::KanMX4, [CEN::URA3::cla4-75], sac7::NatN2</i>                                  |
| ySP8150     | <i>MATa, rho1::HIS3, ade3::rho1-1::LU2</i>                                                                                 |
| ySP8153     | <i>MATa, rho1::HIS3, ade3::rho1-5::LU2</i>                                                                                 |
| ySP8176     | <i>MATa, ura3::URA3::GFP-CDC12</i>                                                                                         |
| ySP8177     | <i>MATa, RHO1-D72N::K.l.LEU2, ura3::URA3::GFP-CDC12</i>                                                                    |
| ySP8259     | <i>MAT<math>\alpha</math>, lrg1::K.l.LEU2</i>                                                                              |
| ySP8310     | <i>MATa, dma1::K.l.TRP1, dma2::HPHMX, cla4::KanMX4, [CEN::URA3::cla4-75], lrg1::K.l.LEU2</i>                               |
| ySP8321     | <i>MAT<math>\alpha</math>, rho1::HIS3, ade3::rho1-5::LEU2, ura3::URA3::GFP-CDC12</i>                                       |
| ySP8323     | <i>MAT<math>\alpha</math>, rho1::HIS3, ade3::rho1-1::LEU2, ura3::URA3::GFP-CDC12</i>                                       |

ySP8334 *MATa, bag7::NatN2*  
ySP8400 *MATa, [CEN::URA3::PKC1-R398P]*  
ySP8436 *MATa, dma1::K.l.TRP1, dma2::HPHMX, cla4::KanMX4, [CEN::URA3::cla4-75], bag7::NatN2*  
ySP8440 *MATa, cdc5::KanMX4, trp1::TRP1::cdc5-4-3HA, [CEN::LEU2::RHO1-D72N]*  
ySP8441 *MATa, cdc5::KanMX4, trp1::TRP1::cdc5-3-3HA, [CEN::LEU2::RHO1-D72N]*  
ySP8463 *MATa, slt2::URA3*  
ySP8476 *MATa, pkc1::KanMX4*  
ySP8501 *MATa, cdc5::KanMX4, trp1::TRP1::cdc5-10-3HA, [CEN::LEU2::RHO1-D72N]*  
ySP8594 *MAT $\alpha$ , pkc1::KanMX4, ura3::URA3::GFP-CDC12*  
ySP8719 *MATa, SYP1-eGFP::KanMX4*  
ySP8723 *MATa, syp1::NatNT2*  
ySP8725 *MATa, SYP1-3HA::K.l.TRP1*  
ySP8741 *MATa, dma1::K.l.TRP1, dma2::HPHMX, cla4::KanMX4, [CEN::URA3::cla4-75], syp1::NatNT2*  
ySP8754 *MATa, SYP1-eGFP::KanMX4, pkc1::KanMX4*  
ySP8799 *MATa, SYP1-3HA::K.l.TRP1, pkc1::KanMX4*  
ySP8784 *MATa, SYP1-3HA::K.l.TRP1, dma1::K.l.TRP1, dma2::K.l.LEU2*  
ySP8803 *MATa, syp1::NatNT2, ura3::URA3::GFP-CDC12*  
ySP8868 *MATa, syp1::NatNT2, cdc12-1*  
ySP8910 *MAT $\alpha$ , cdc12-1, [CEN::URA3::PKC1-R398P]*  
ySP8912 *MAT $\alpha$ , cdc12-6, [CEN::URA3::PKC1-R398P]*  
ySP9547 *MATa, MYO1-GFP::KanMX4, SHS1-mCherry::HphMX*  
ySP9554 *MATa, MYO1-GFP::KanMX4, SHS1-mCherry::HphMX, RHO1-D72N::K.l.LEU2*  
ySP9816 *MATa, SYP1-6Gly-3Flag::KanMX4*  
ySP9818 *MATa, SYP1-6Gly-3Flag::KanMX4, pkc1::KanMX4*  
ySP10091 *MATa, SYP1-S347A,S389A,S390A::LEU2::syp1::NatNT2, ura3::URA3::GFP-CDC12*  
ySP10092 *MATa, SYP1-S347D,S389D,S390D::LEU2::syp1::NatNT2, ura3::URA3::GFP-CDC12*  
ySP10121 *MATa, SYP1-S347A,S389A,S390A::LEU2::syp1::NatNT2*  
ySP10122 *MATa, SYP1-S347D,S389D,S390D::LEU2::syp1::NatNT2*  
ySP10150 *MATa, SYP1-S347A,S389A,S390A-eGFP::KanMX4::LEU2::syp1::NatNT2, ura3::URA3::GFP-CDC12*  
ySP10151 *MATa, SYP1-S347D,S389D,S390D-eGFP::KanMX4::LEU2::syp1::NatNT2, ura3::URA3::GFP-CDC12*  
ySP10228 *MATa, SYP1-S347A-3HA::K.l.TRP1::LEU2::syp1::NatNT2, ura3::URA3::GFP-CDC12*  
ySP10229 *MATa, SYP1-S347A,S389A,S390A-3HA::K.l.TRP1::LEU2::syp1::NatNT2*

ySP10361 *MATa, SYP1-eGFP::KanMX4, SHS1-mCherry::HphMX*  
ySP10819 *MATa, SHS1-GFP::LEU2*  
ySP10820 *MAT $\alpha$ , dma1::K.l.TRP1, dma2::HPHMX, cla4::KanMX4, [CEN::URA3::cla4-75], SHS1-GFP::LEU2*  
ySP10821 *MAT $\alpha$ , dma1::K.l.TRP1, dma2::HPHMX, cla4::KanMX4, [CEN::URA3::cla4-75], RHO1-D72N, SHS1-GFP::LEU2*  
ySP10823 *MATa, dma1::K.l.TRP1, dma2::HPHMX, cla4::KanMX4, [CEN::URA3::cla4-75], PKC1-103, SHS1-GFP::LEU2*  
ySP11335 *MATa, SHS1-GFP::LEU2, ura3::URA3::GIC2-PBD-(W23A)RFP*  
ySP11369 *MATa, bud4::LEU2::BUD4, ura3::URA3::GFP-CDC12*  
ySP11416 *MAT $\alpha$ , SHS1-GFP::LEU2, ura3::URA3::GIC2-PBD-(W23A)RFP, RHO1-D72N::K.l.LEU2*  
ySP11419 *MATa, bud4::URA3::BUD4, dma1::K.l.LEU2, dma2::HPHMX, cla4::NatNT2, [CEN::TRP1::cla4-75],*  
ySP11482 *MATa, bud4::LEU2::BUD4, ura3::URA3::GFP-CDC12, pkc1::KanMX4*  
ySP11558 *MATa, SHS1-GFP::LEU2, ura3::URA3::GIC2-PBD-(W23A)RFP, PKC1-R398P*  
ySP11650 *MAT $\alpha$ , bud4::LEU2::BUD4, cdc12-6, GFP-CDC3::URA3, RHO1-D72N::K.l.LEU2*  
ySP11651 *MAT $\alpha$ , bud4::LEU2::BUD4, cdc12-6, GFP-CDC3::URA3*  
ySP11672 *MAT $\alpha$ , bud4::LEU2::BUD4, cdc12-6, GFP-CDC3::URA3, PKC1-R398P*

**Plasmids  
Name**

**Description**

**Source/Reference**

|         |                                                                         |                     |
|---------|-------------------------------------------------------------------------|---------------------|
| pSP340  | <i>cla4-75</i> cloned in EcoRI/HindIII of Ycplac33 ( <i>CEN, URA3</i> ) | This study          |
| pSP671  | <i>3HA-RHO1-G19V</i> cloned in pRS305 ( <i>LEU2</i> )                   | Tiedje et al., 2008 |
| pSP672  | <i>3HA-RHO1-D125A</i> cloned in pRS305 ( <i>LEU2</i> )                  | Tiedje et al., 2008 |
| pSP675  | <i>RHO1-D72N</i> cloned in YCplac111 ( <i>CEN, LEU2</i> )               | This study          |
| pSP677  | <i>PKC1-R398P</i> cloned in YCp50                                       | Gift from M. Hall   |
| pSP789  | <i>SYP1</i> (-480 to +2770) cloned in YIplac128 ( <i>LEU2</i> )         | This study          |
| pSP794  | <i>SYP1(S347A)</i> (-480 to +2770) cloned in YIplac128 ( <i>LEU2</i> )  | This study          |
| pSP908  | <i>MKK1-S386P</i> cloned in YCplac33 ( <i>CEN, URA3</i> )               | Gift from M. Hall   |
| pSP909  | <i>SLT2</i> cloned in YEp352 ( <i>2<math>\mu</math>, URA3</i> )         | Gift from M. Hall   |
| pSP961  | <i>syp1</i> (aa1-264) cloned in pET28a C/U                              | Reider et al., 2009 |
| pSP962  | <i>syp1</i> (aa265-565) cloned in pET28a C/U                            | Reider et al., 2009 |
| pSP966  | <i>syp1</i> (aa566-870) cloned in pET28a C/U                            | Reider et al., 2009 |
| pSP1009 | <i>PKC1(HR1-C2)-GFP, URA3, CEN</i>                                      | Kono et al., 2012   |

|         |                                                                                      |                            |
|---------|--------------------------------------------------------------------------------------|----------------------------|
| pSP1010 | PKC1(HR1-C2)(L54S)-GFP, URA3, CEN                                                    | Kono et al., 2012          |
| pSP1011 | <i>2HA-BNII-13myc, TRP, CEN</i>                                                      | Kono et al., 2012          |
| pSP1012 | <i>2HA-BNII(V360D)-13myc, TRP, CEN</i>                                               | Kono et al., 2012          |
| pSP1026 | <i>SYP1(S347A, S389A, S390A)</i> (-480 to +2770) cloned in YIplac128 ( <i>LEU2</i> ) | This study                 |
| pSP1027 | <i>SYP1(S347D, S389D, S390D)</i> (-480 to +2770) cloned in YIplac128 ( <i>LEU2</i> ) | This study                 |
| pSP1065 | <i>CDC42-D65N</i> cloned in pSR315 ( <i>CEN, LEU2</i> )                              | Mosch et al., 2001         |
| pSP1089 | <i>BCK1-20</i> cloned in pRS314 ( <i>CEN, TRP1</i> )                                 | Gift from G. De Bettignies |
